# Supplementary material for: Evidence does not support absorption of intact solid lipid nanoparticles via oral delivery
Source: Royal Society of Chemistry journal article supplement (doi:10.1039/c5nr07474f), 2015-12-15
Supplement: c5nr07474f5.pdf [file c5nr07474f5.pdf]

Table 1S The particle size and PDI of mixed micelles prepared with fixed STC/lecithin molar ratio but different amount of MG and FA

| No. | Composition (molar ratio) |          |     |     | Particle size (nm) | PDI   |
|-----|---------------------------|----------|-----|-----|--------------------|-------|
|     | STC                       | Lecithin | MG  | FA  |                    |       |
| 1   | 4                         | 1        | 0   | 0   | 28.7 ± 8.6         | 0.232 |
| 2   | 4                         | 1        | 0.1 | 0.1 | 42.3 ± 9.2         | 0.218 |
| 3   | 4                         | 1        | 0.1 | 0.2 | 60.6 ± 29.6        | 0.494 |
| 4   | 4                         | 1        | 0.2 | 0.1 | 75.4 ± 34.7        | 0.572 |
| 5   | 4                         | 1        | 0.5 | 0.5 | 266.4 ± 31.1       | 0.405 |
| 6   | 4                         | 1        | 1   | 1   | 653.6 ± 72.3       | 0.473 |

Table 2S The particle size and PDI of mixed micelles prepared with fixed PO/lecithin molar ratio but different amount of MG and FA

| No. | Composition (molar ratio) |          |     |     | Particle size (nm) | PDI   |
|-----|---------------------------|----------|-----|-----|--------------------|-------|
|     | PO                        | Lecithin | MG  | FA  |                    |       |
| 1   | 4                         | 1        | 0   | 0   | 52.2 ± 10.4        | 0.245 |
| 2   | 4                         | 1        | 0.1 | 0.1 | 76.3 ± 9.7         | 0.231 |
| 3   | 4                         | 1        | 0.1 | 0.2 | 113.6 ± 18.4       | 0.359 |
| 4   | 4                         | 1        | 0.2 | 0.1 | 107.2 ± 21.6       | 0.493 |
| 5   | 4                         | 1        | 0.5 | 0.5 | 372.9 ± 34.8       | 0.583 |
| 6   | 4                         | 1        | 1   | 1   | 822.1 ± 60.3       | 0.411 |

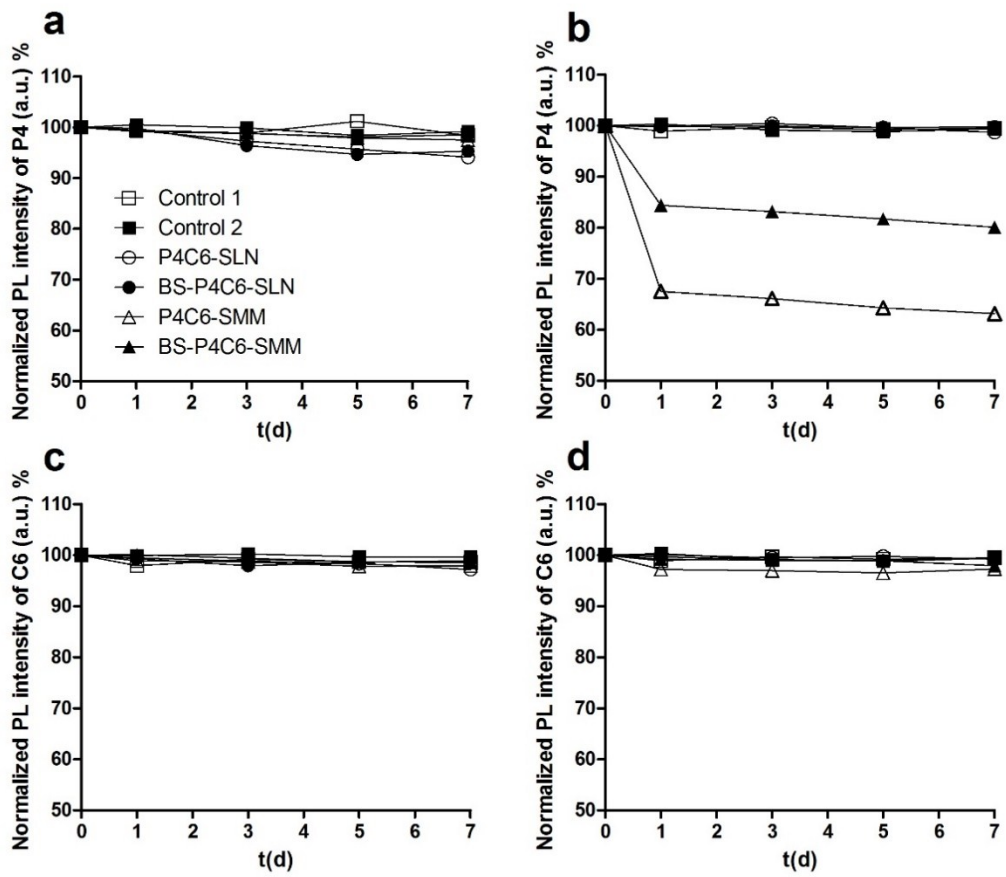

Fig. 1S PL intensity changes of P4 (a, b) and C6 (c,d) in different formulations stored at 20°C (a, c) and 4°C (b, d)
